# Supplementary material
Source: HighWire-hosted journal article supplement (https://lupus.bmj.com/content/10/2/e001018)
Supplement: inline-supplementary-material-2 [file inline-supplementary-material-2.pdf]

## Appendix B Search Strategies for *Therapy with Direct Oral Anticoagulants for Antiphospholipid Syndrome: A Systematic Review and Meta-Analysis of Randomized Trials*

PROSPERO CRD42019126720

Medline Search Strategy Ovid MEDLINE(R) and Epub Ahead of Print, In-Process & Other Non-Indexed Citations and Daily

#1 Antiphospholipid Syndrome/

#2 (Antiphospholipid Antibody Syndrome or anti-phospholipid antibody syndrome).mp.

#3 ashersons.mp.

#4 exp Antibodies, Antiphospholipid/

#5 ((antiphospholipid or anti-phospholipid or phospholipid or anti-cardiolipin or anticardiolipin or cardiolipin or beta 2-glycoprotein) adj5 (auto\$ or antibod\$ or syndrome or inhibit\$)).mp.

#6 1 or 2 or 3 or 4 or 5

#7 Anticoagulant\$.mp. or Anticoagulants/

#8 ((anticoagula\* or anti-coagula\* or antithrombot\* or anti thrombot\* or anti-thrombot\*) adj2 (agent\$ or drug\$ or therapy)).mp.

#9 (direct oral anticoagulant\$ or DOAC\$ or direct-acting oral anticoagulant\$).mp.

#10 (new oral anticoagulant\$ or Novel Oral Anticoagulant\$ or non-vitamin K anticoagulant\$ or NOAC\$).mp.

#11 (target-specific oral anticoagulant\$ or TSOAC).mp.

#12 (brixaban or bevyxxa).mp.

#13 factor Xa inhibitor\$.mp. or Factor Xa Inhibitors/ or factor 10a inhibitor\$.mp.

#14 xarelto.mp. or Rivaroxaban/ or Rivaroxaban.mp.

#15 (apixaban or eliquis or eliques).mp.

#16 dabigatran.mp. or Dabigatran/ or dabigatran etexilate.mp. or pradaxa.mp. or pradax.mp.

#17 (edoxaban or Savaysa or Lixiana).mp.

#18 (thrombin inhibitor\$ or antithrombin or direct thrombin inhibitor\$).mp. or antithrombin

#19 7 or 8 or 9 or 10 or 11 or 12 or 13 or 14 or 15 or 16 or 17 or 18

#20 ((randomized controlled trial or controlled clinical trial).pt. or randomized.ab. or randomised.ab. or clinical trials as topic.sh. or randomly.ab. or trial.ti.) not (exp animals/ not humans.sh.)

#21 6 and 19 and 20

Embase Search Strategy **Classic+Embase**

- #1 antiphospholipid syndrome/
- #2 (Antiphospholipid Antibody Syndrome or Anti-Phospholipid Antibody Syndrome).mp.
- #3 ashersons.mp.
- #4 exp Antibodies, Antiphospholipid/
- #5 ((antiphospholipid or anti-phospholipid or phospholipid or anti-cardiolipin or anticardiolipin or cardiolipin or beta 2-glycoprotein) adj5 (auto\$ or antibod\$ or syndrome or inhibit\$)).mp.
- #6 1 or 2 or 3 or 4 or 5
- #7 Anticoagulant\$.mp. or anticoagulant agent/
- #8 ((anticoagula\* or anti-coagula\* or antithrombotic or anti thrombotic or anti-thrombotic) adj2 (agent\$ or drug\$ or therapy)).mp. [mp=title, abstract, heading word, drug trade name, original title, device manufacturer, drug manufacturer, device trade name, keyword, floating subheading word, candidate term word]
- #9 anticoagulation.mp. or anticoagulation/
- #10 (direct oral anticoagulant\$ or DOAC\$ or direct-acting oral anticoagulant\$).mp.
- #11 (new oral anticoagulant\$ or Novel Oral Anticoagulant\$ or non-vitamin K antagonist\$ oral anticoagulant\$ or NOAC\$).mp.
- #12 (target-specific oral anticoagulant\$ or TSOAC).mp.
- #13 betrixaban.mp. or betrixaban/ or bevyxxa.mp.
- #14 factor Xa inhibitor.mp. or blood clotting factor 10a inhibitor/ or factor 10a inhibitor.mp.
- #15 xarelto.mp. or rivaroxaban/ or rivaroxaban.mp.
- #16 apixaban.mp. or apixaban/ or (eliquis or eliques).mp.
- #17 dabigatran etexilate/ or dabigatran/ or dabigatran.mp. or (pradaxa or pradax).mp.
- #18 edoxaban.mp. or edoxaban/ or savaysa.mp. or Lixiana.mp.
- #19 thrombin inhibitors\$.mp. or thrombin inhibitor/ or antithrombin/ or direct thrombin inhibitors\$.mp.
- #20 (factor 2a inhibitor or factor IIa inhibitor).mp.
- #21 7 or 8 or 9 or 10 or 11 or 12 or 13 or 14 or 15 or 16 or 17 or 18 or 19 or 20
- #22 double-blind procedure/ or randomized controlled trial/ or single-blind procedure/ or (random\* or factorial\* or placebo\* or (doubl\* adj blind\*) or (singl\* adj blind\*) or assign\* or allocat\* or volunteer\*).tw.
- #23 6 and 21 and 22

CENTRAL Search Strategy *Cochrane Library – Central Register of Controlled Trials*

- #1 MeSH descriptor: [Anticoagulants] explode all trees
- #2 (anticoagulants or anticoagulation):ti,ab,kw (Word variations have been searched)
- #3 (anticoagulation agent):ti,ab,kw (Word variations have been searched)
- #4 (anticoagulation drugs):ti,ab,kw (Word variations have been searched)
- #5 (anticoagulation therapy):ti,ab,kw (Word variations have been searched)
- #6 (new oral anticoagulants or NOAC or novel oral anticoagulants or non-vitamin k antagonist oral anticoagulant):ti,ab,kw (Word variations have been searched)
- #7 (direct oral anticoagulants or direct-acting oral anticoagulants or DOAC):ti,ab,kw (Word variations have been searched)
- #8 (target specific anticoagulants or TSOAC):ti,ab,kw (Word variations have been searched)
- #9 (betrixaban or bevyxxa):ti,ab,kw (Word variations have been searched)
- #10 (factor xa inhibitor or factor 10a inhibitor):ti,ab,kw (Word variations have been searched)
- #11 (xarelto or rivaroxaban):ti,ab,kw (Word variations have been searched)
- #12 (apixaban or eliquis or eliques):ti,ab,kw (Word variations have been searched)
- #13 (dabigatran or dabigatran etexilate or pradaxa or pradax):ti,ab,kw (Word variations have been searched)
- #14 (edoxaban or savaysa or lixiana):ti,ab,kw
- #15 (thrombin inhibitor or antithrombin or direct thrombin inhibitor):ti,ab,kw (Word variations have been searched)
- #16 #1 or #2 or #3 or #4 or #5 or #6 or #7 or #8 or #9 or #10 or #11 or #12 or #13 #15
- #17 ("antiphospholipid syndrome"):ti,ab,kw (Word variations have been searched)
- #18 MeSH descriptor: [Antiphospholipid Syndrome] explode all trees
- #19 ("antiphospholipid antibody syndrome"):ti,ab,kw (Word variations have been searched)
- #20 ("antiphospholipid antibodies"):ti,ab,kw (Word variations have been searched)
- #21 ("antiphospholipid antibody"):ti,ab,kw (Word variations have been searched)
- #22 ("anticardiolipin antibodies"):ti,ab,kw (Word variations have been searched)
- #23 (anticardiolipin antibody):ti,ab,kw (Word variations have been searched)
- #24 (beta 2 glycoprotein):ti,ab,kw (Word variations have been searched)
- #25 #17 or #18 or #19 or #20 or #21 #22 #23 or #24
- #26 #16 and #25
