# Supplementary material
Source: HighWire-hosted journal article supplement (https://lupus.bmj.com/content/10/2/e001018)

## Appendix figure 1. Subgroup analyses

### A. Occurrence of arterial thrombosis during treatment with DOACs and VKA

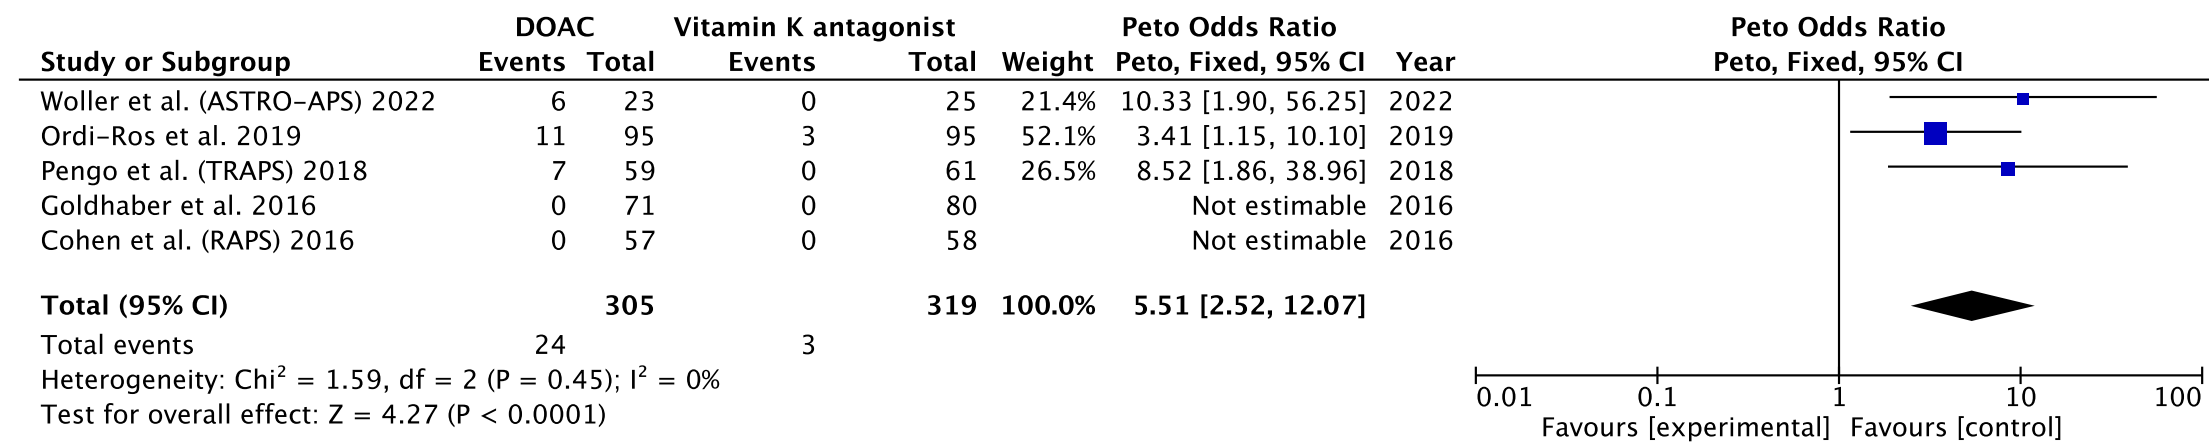

### E. Occurrence of thrombosis during treatment with DOACs and VKA in patients with triple positivity

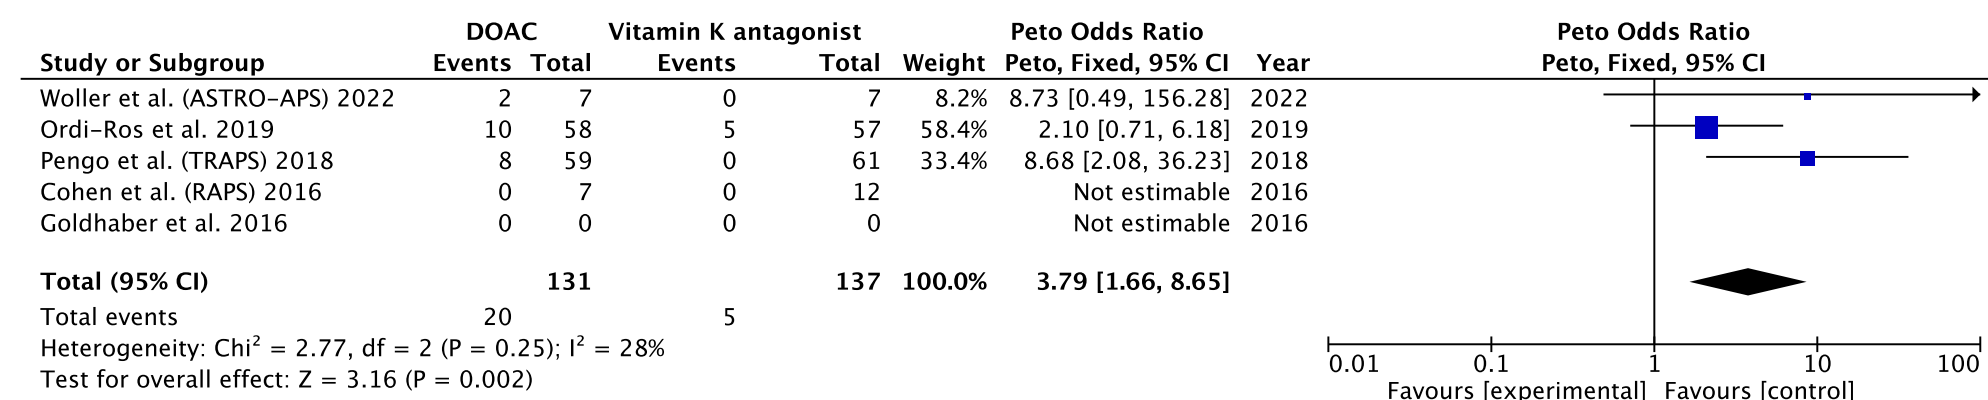

### B. Occurrence of venous thrombosis during treatment with DOACs and VKA

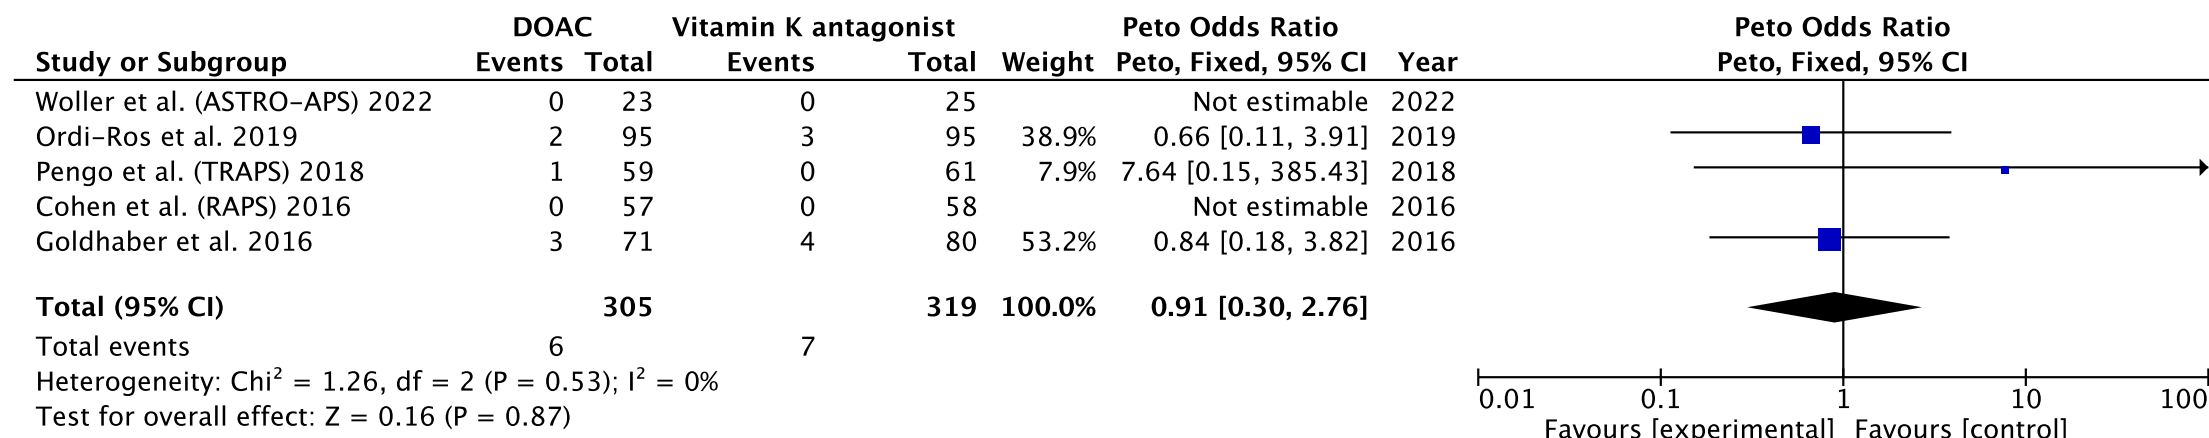

### C. Occurrence of thrombosis during treatment with DOACs and VKA in patients with previous arterial thrombosis

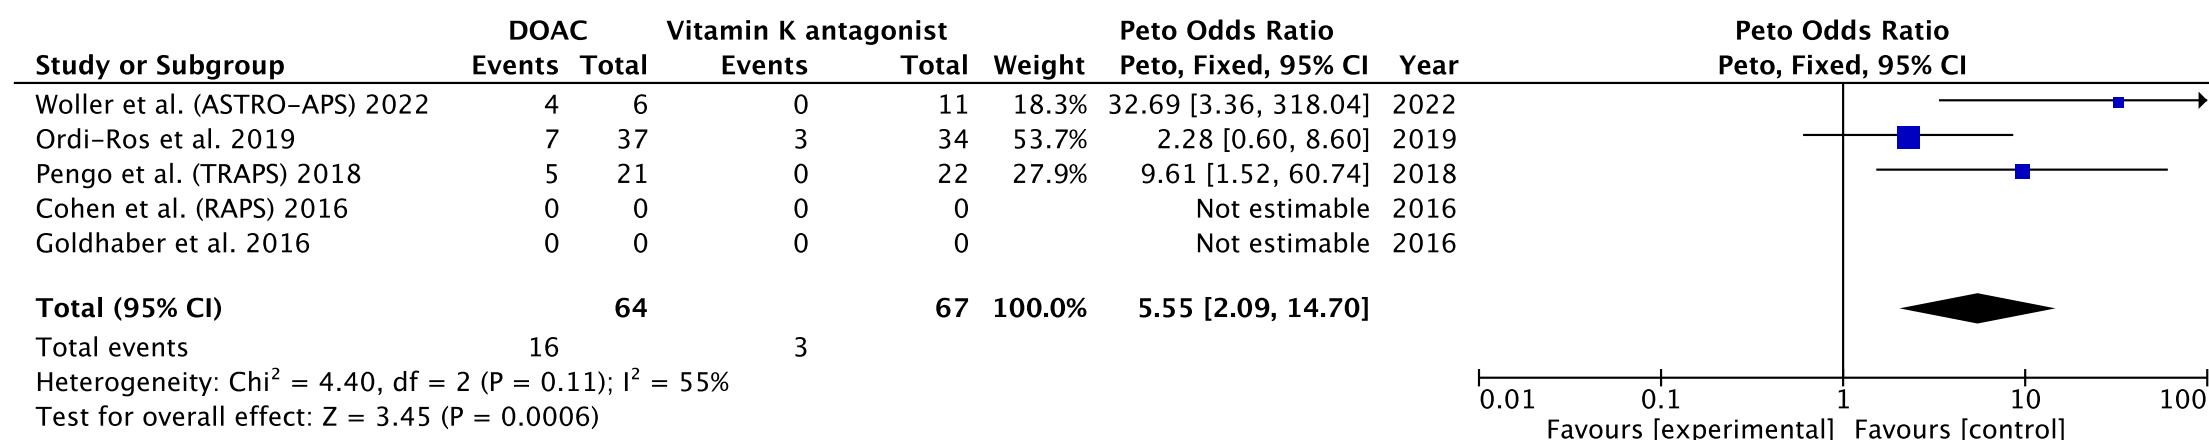

### D. Occurrence of thrombosis during treatment with DOACs and VKA in patients with previous venous thrombosis

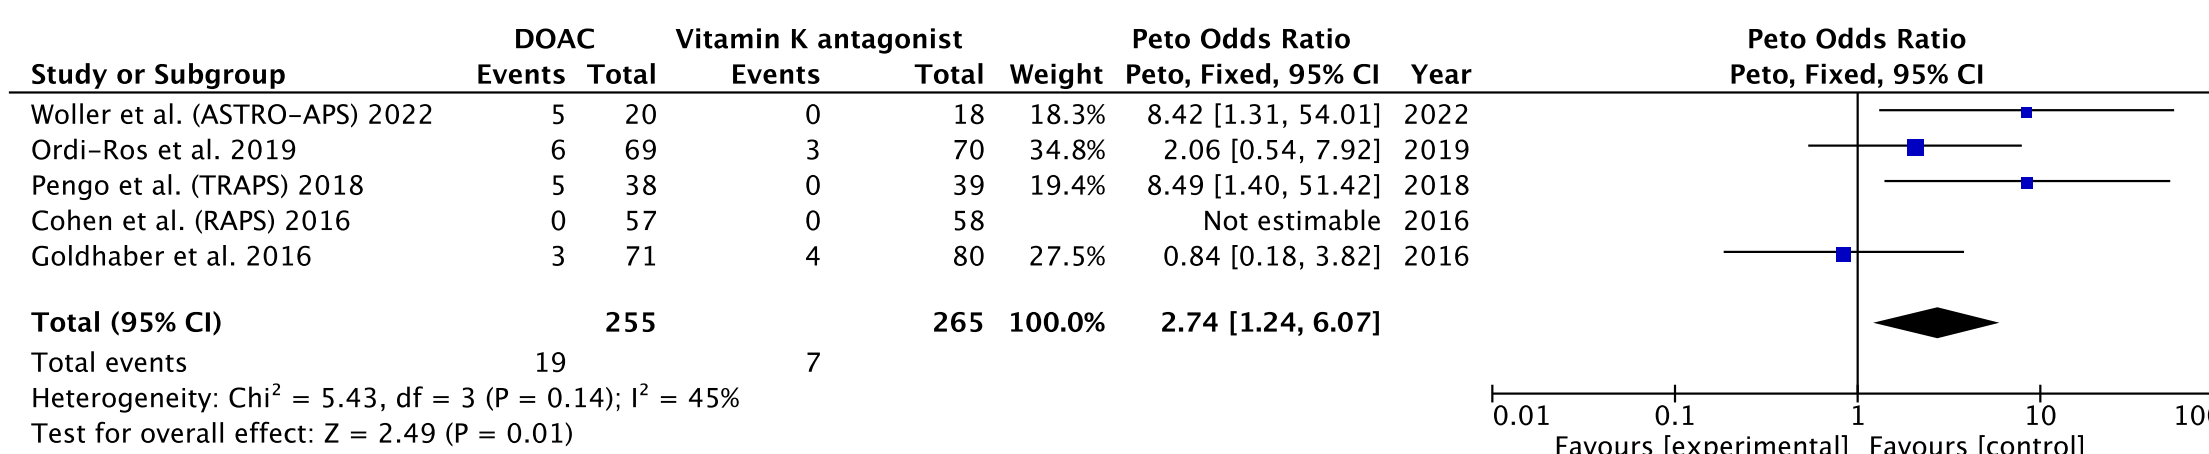

Supplement: inline-supplementary-material-6 [file inline-supplementary-material-6.pdf]
